# Supplementary material for: Pronounced Seasonal Changes in the Movement Ecology of a Highly Gregarious Central-Place Forager, the African Straw-Coloured Fruit Bat (Eidolon helvum)
Source: PubMed Central journal article supplement (PMC4605647; doi:10.1371/journal.pone.0138985), 2015-10-14

**Figure S3: Examples of space use of *Eidolon helvum*.** Yellow dots: GPS-points, pale blue: foraging areas (95 % UD), dark blue: core areas (50 % UD). Map data © 2013 Google and DigitalGlobe / GeoEye.

**Wet season (note that foraging sites are mostly located in (sub-) urban areas)**

Bat #1088:

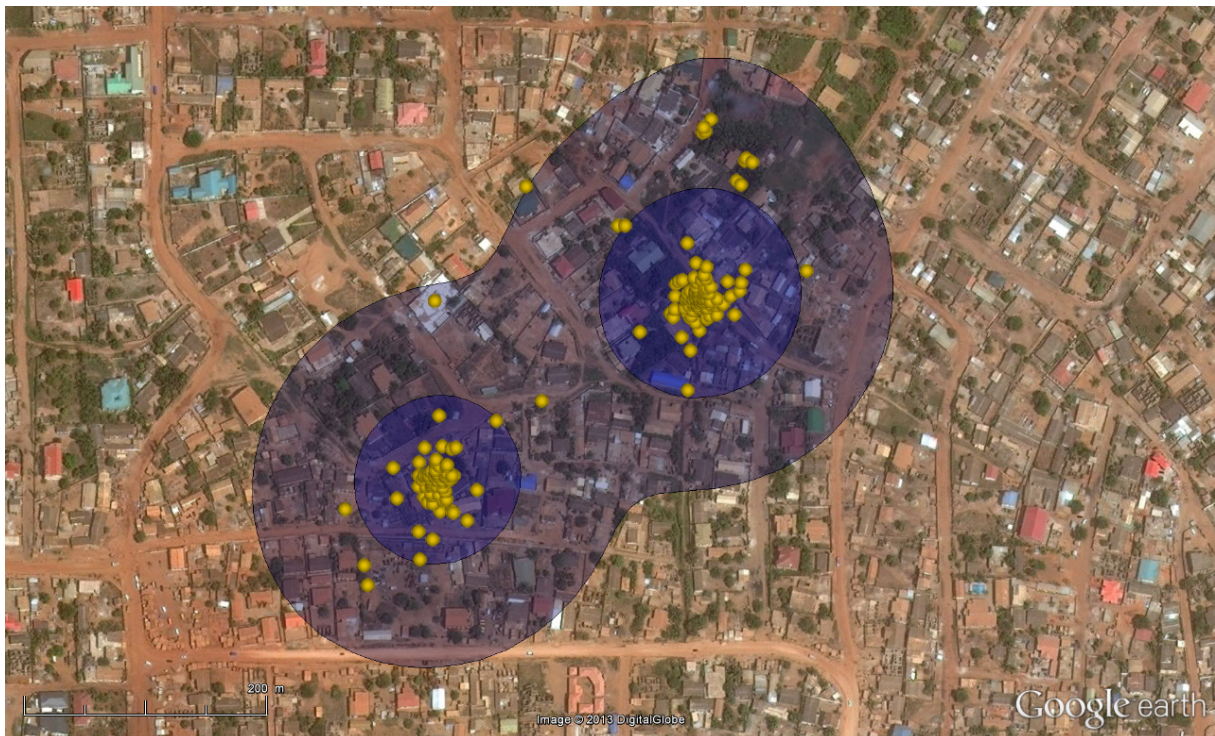



Bat #1078 overview:

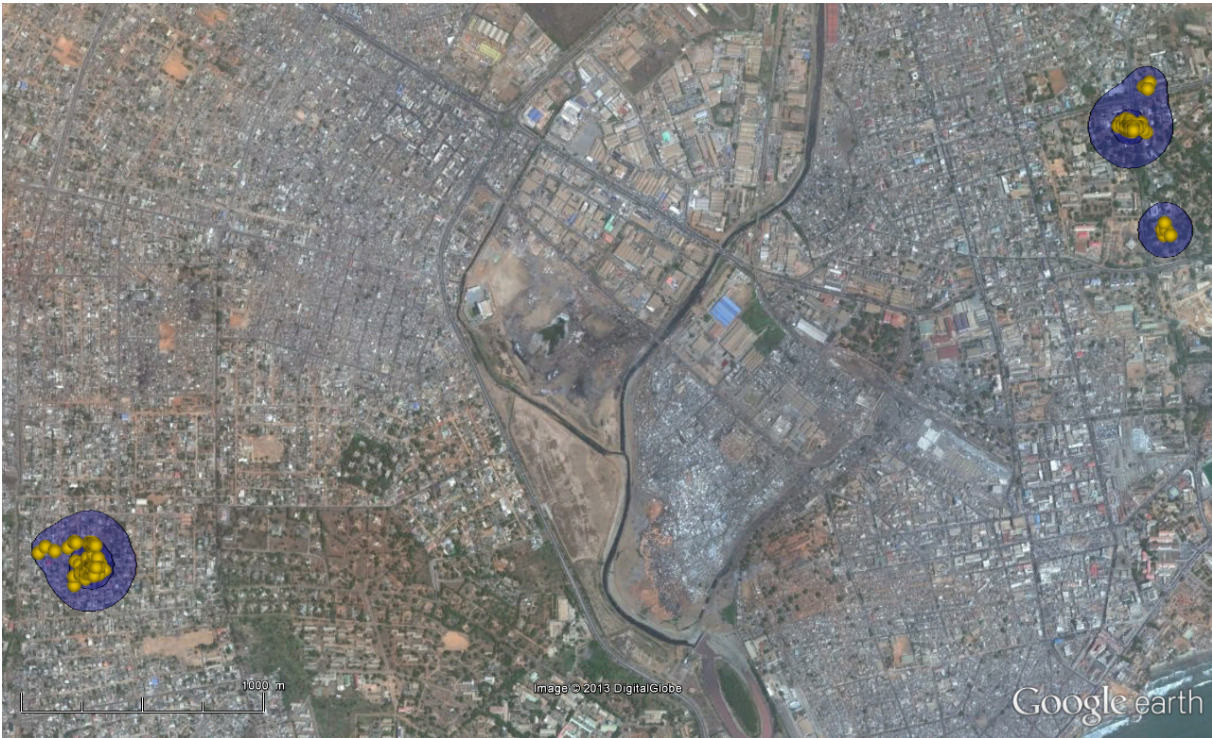

Bat #1078 detail:

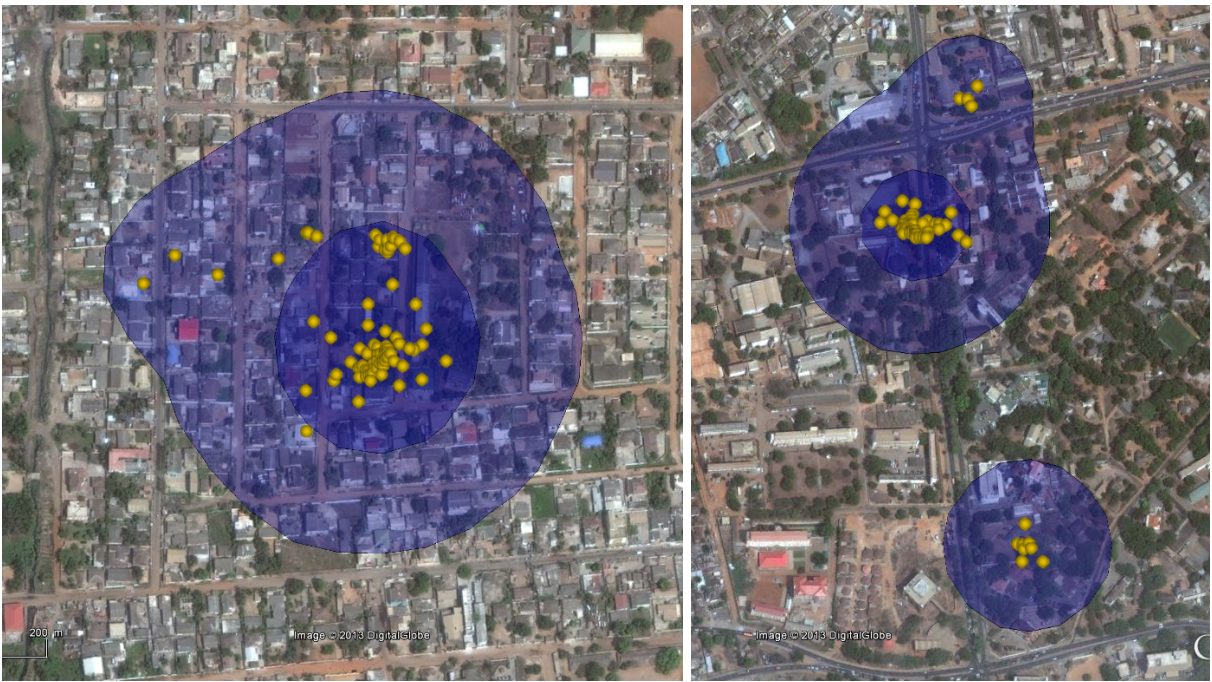



Bat #1080 (left) and #1081 (right):

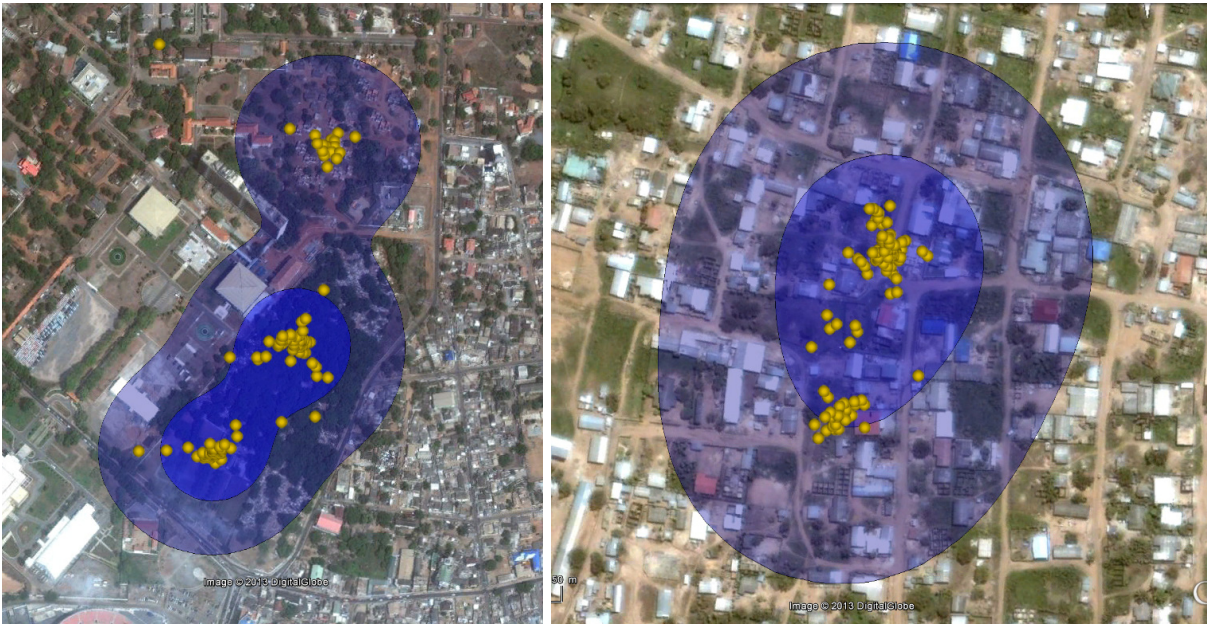

Bat #1084 overview (left) and detail (right):

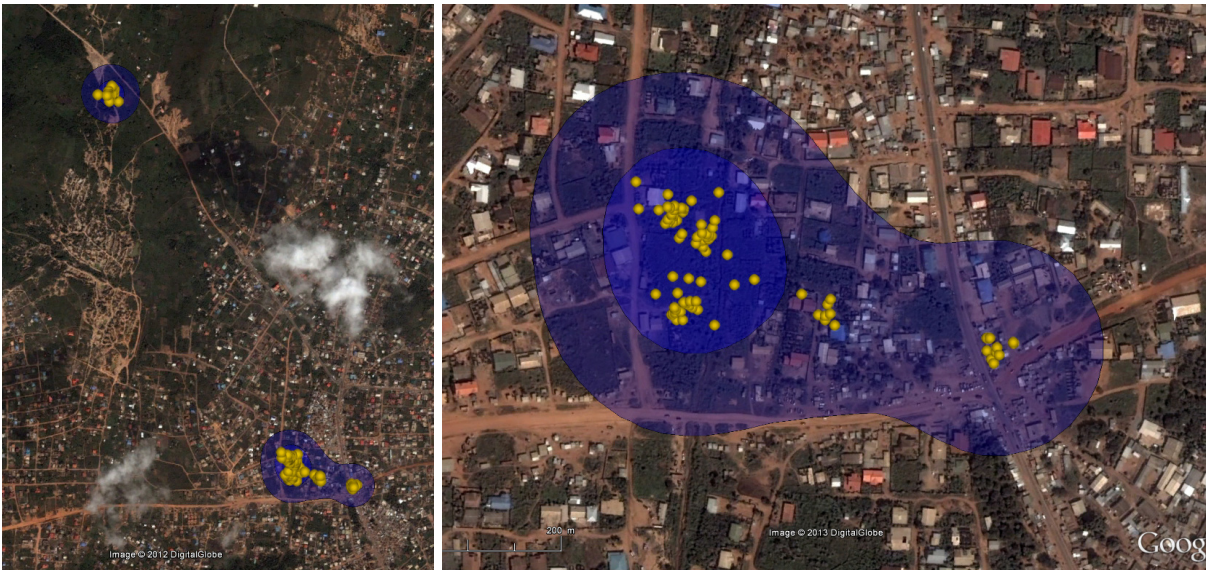



Bat #1078 overview:



Bat #1078 detail:





Bat #1620 overview:

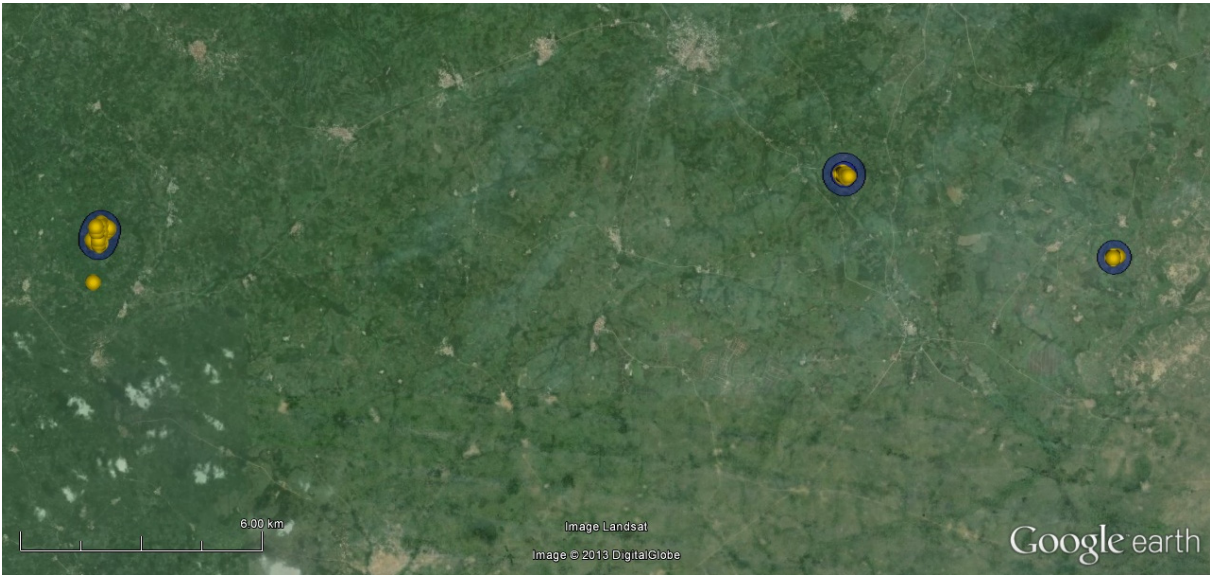

Bat #1620 detail (left: west, right: east):

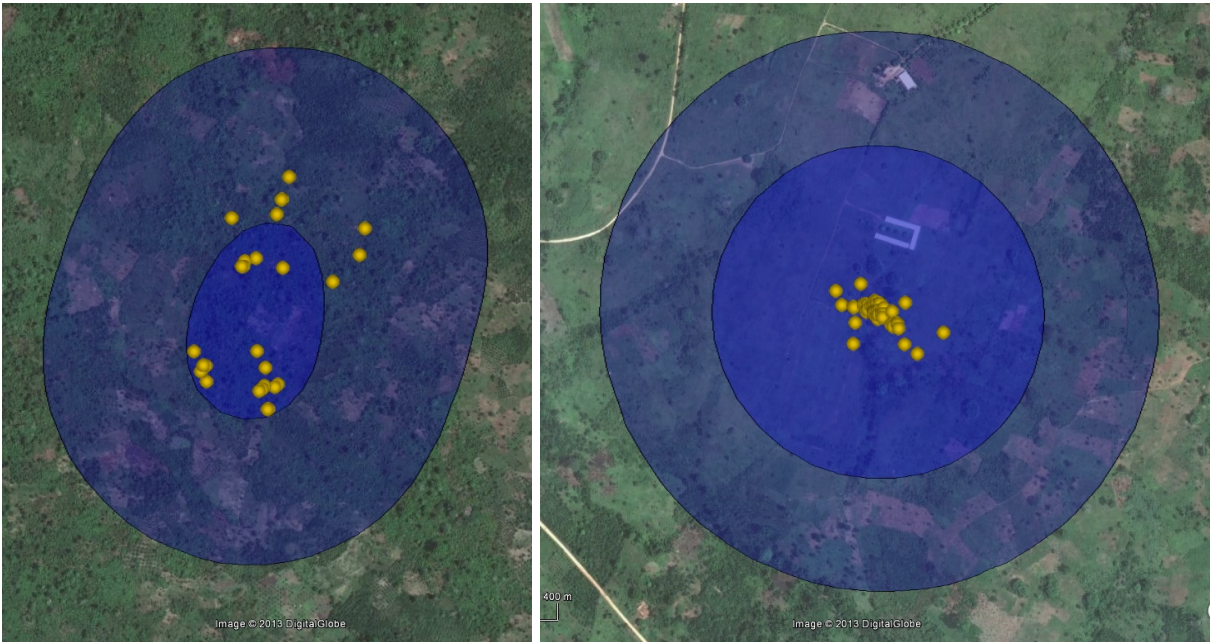

Bat #1626:

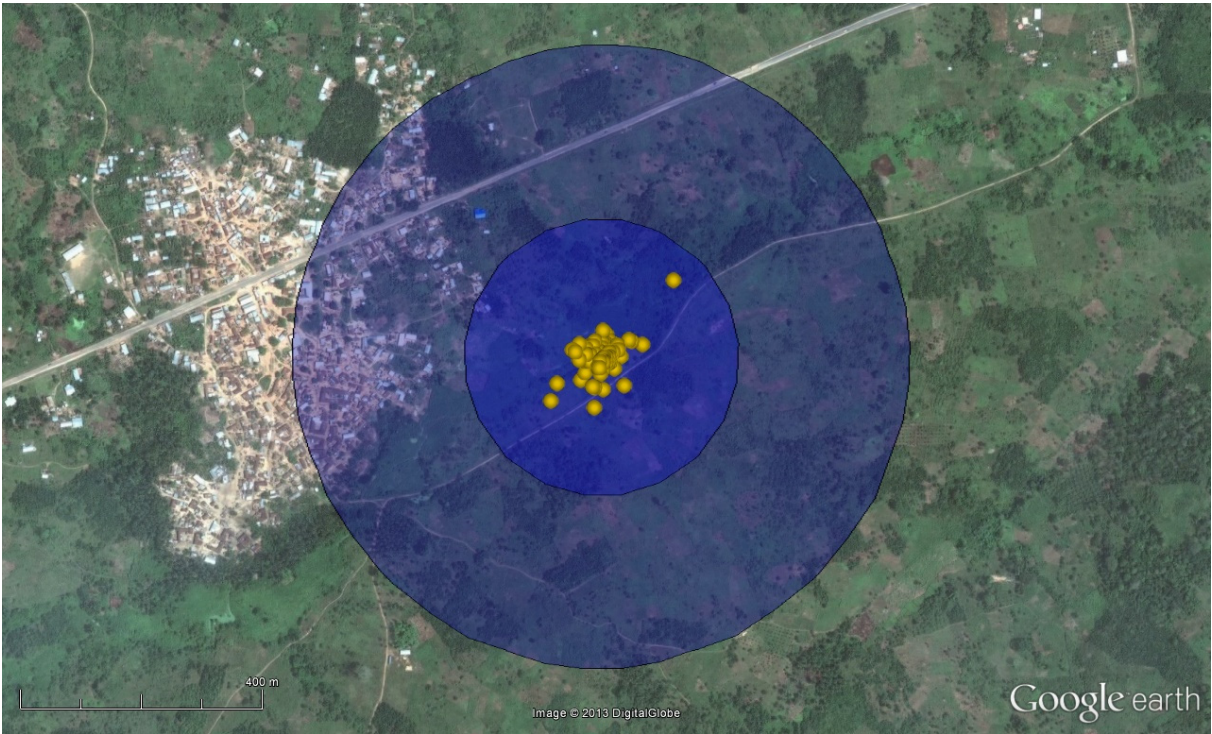

Supplement: pone.0138985.s004.pdf [file pone.0138985.s004.pdf]
